# Supplementary material for: Spatiotemporally Heterogeneous Population Dynamics of Gut Bacteria Inferred from Fecal Time Series Data
Source: PubMed Central journal article supplement (PMC5760738; doi:10.1128/mbio.01453-17), 2018-01-09

(A)

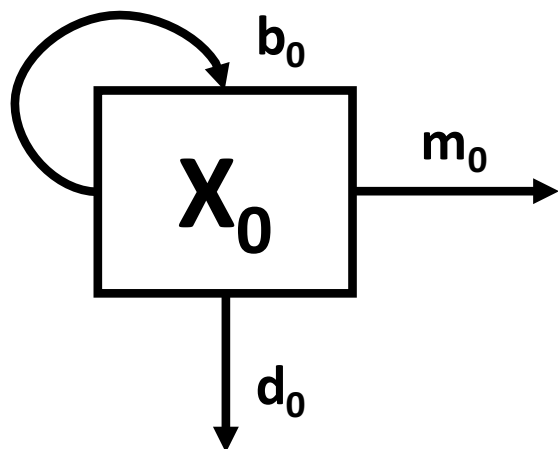

(B)

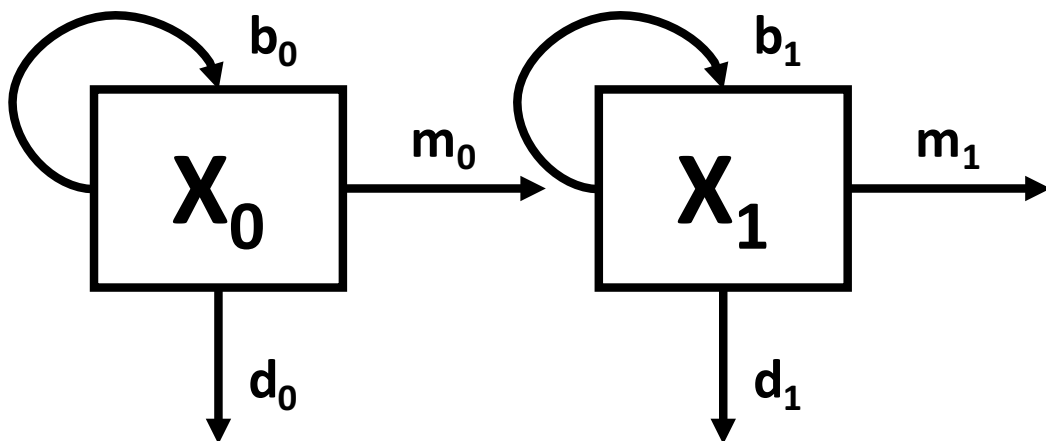

(C)

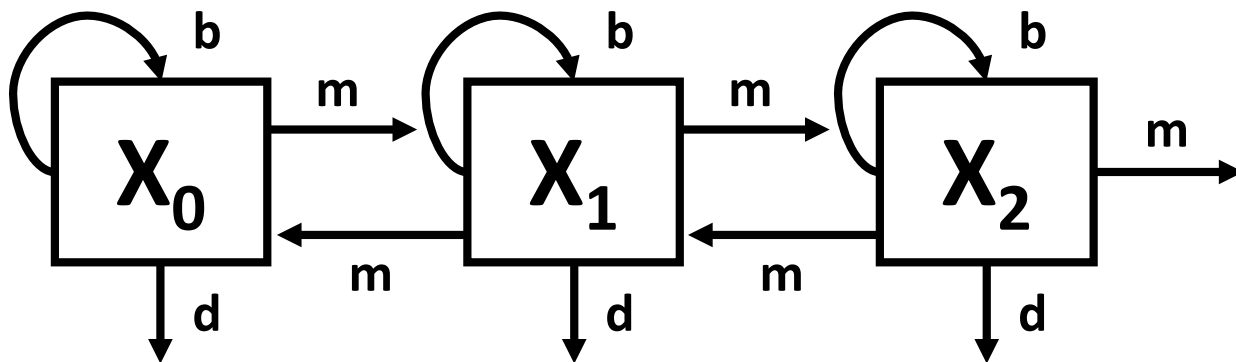

Supplement: mbo001183662sf3.pdf [file mbo001183662sf3.pdf]
