# Supplementary material for: Spatiotemporally Heterogeneous Population Dynamics of Gut Bacteria Inferred from Fecal Time Series Data
Source: PubMed Central journal article supplement (PMC5760738; doi:10.1128/mbio.01453-17), 2018-01-09

**Cumulative distribution of egestion time with  $m = 0.25$  and varying  $r$**

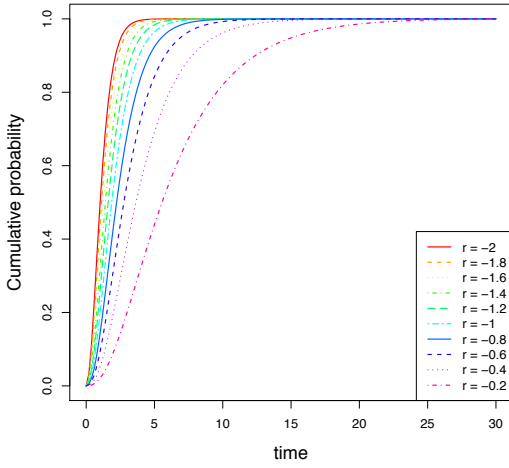

**Cumulative distribution of egestion time with  $r = -0.25$  and varying  $m$**

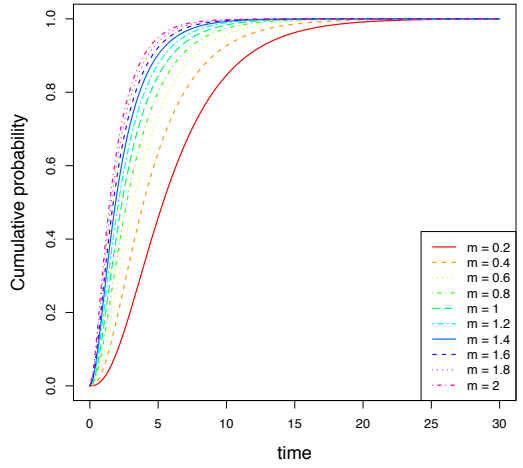

**Mean egestion time with  $m = 0.25$  and varying  $r$**

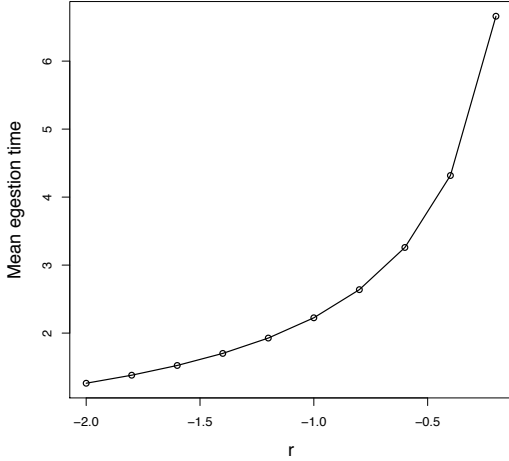

**Mean egestion time with  $r = -0.25$  and varying  $m$**

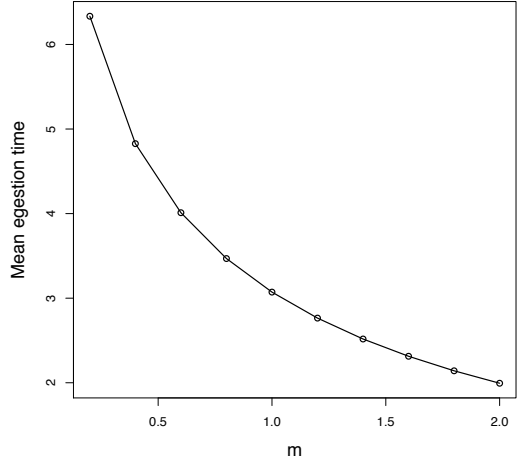

**Variance of egestion time with  $m = 0.25$  and varying  $r$**

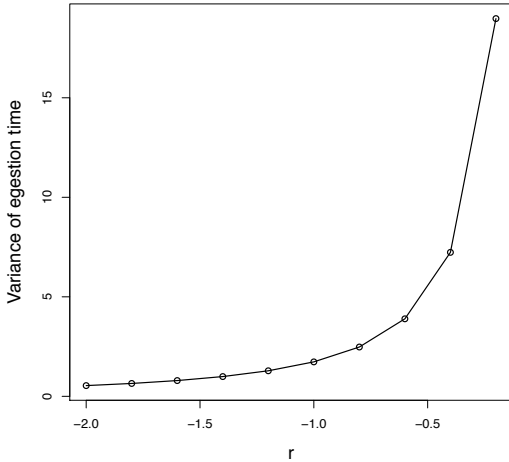

**Variance of egestion time with  $r = -0.25$  and varying  $m$**

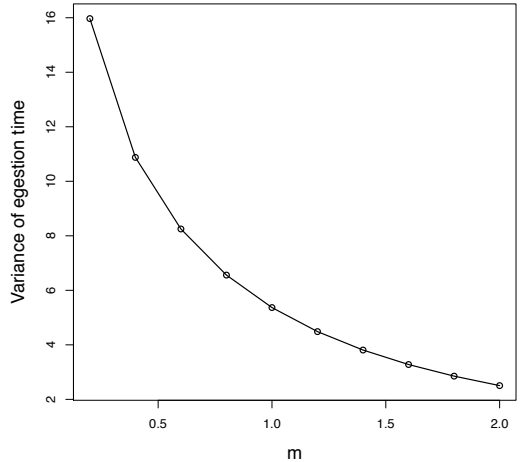

Supplement: mbo001183662sf4.pdf [file mbo001183662sf4.pdf]
