# Supplementary material for: Spatiotemporally Heterogeneous Population Dynamics of Gut Bacteria Inferred from Fecal Time Series Data
Source: PubMed Central journal article supplement (PMC5760738; doi:10.1128/mbio.01453-17), 2018-01-09

Some examples of  $f$

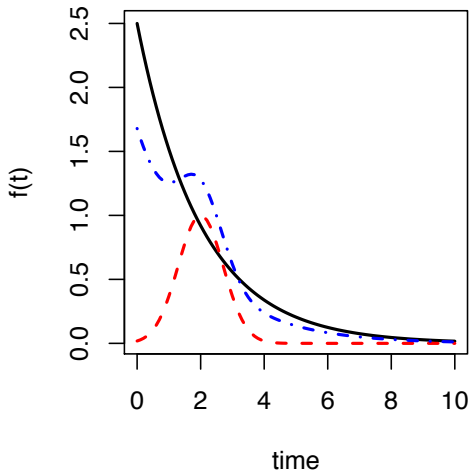

Some examples of  $g$

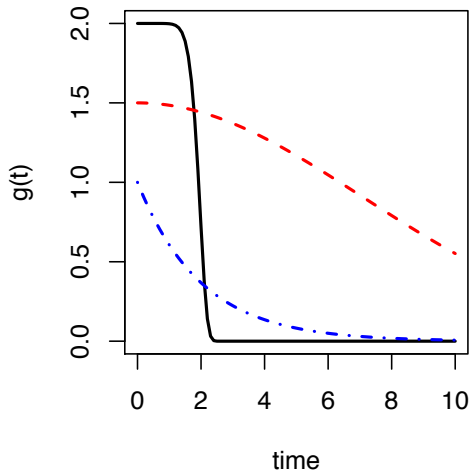

Supplement: mbo001183662sf5.pdf [file mbo001183662sf5.pdf]
