# Supplementary material for: Spatiotemporally Heterogeneous Population Dynamics of Gut Bacteria Inferred from Fecal Time Series Data
Source: PubMed Central journal article supplement (PMC5760738; doi:10.1128/mbio.01453-17), 2018-01-09

## Theory

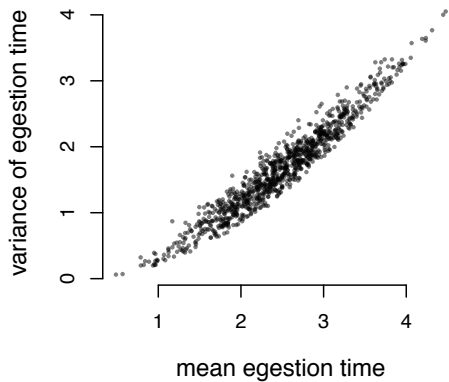

## Experiment

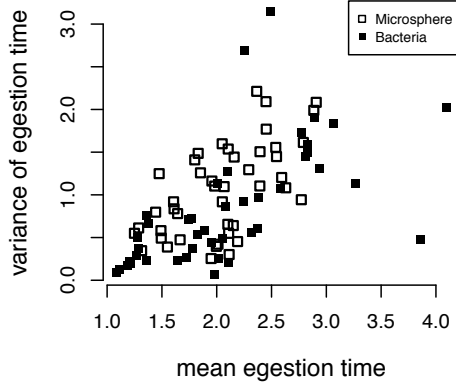

## Theory

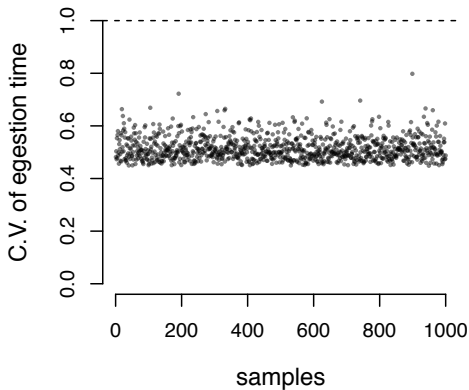

## Experiment

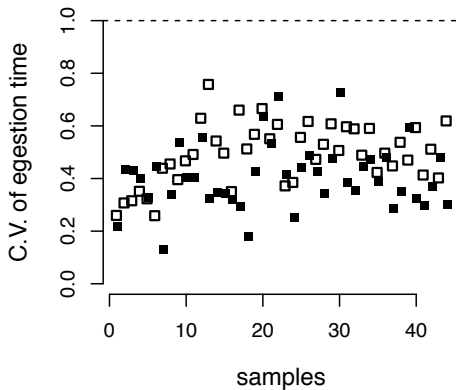

Supplement: mbo001183662sf6.pdf [file mbo001183662sf6.pdf]
